# Supplementary material for: Preparation and Drug-Loading Properties of Amphoteric Cassava Starch Nanoparticles
Source: MDPI journal article supplement (doi:10.3390/nano12040598), 2022-02-10
Supplement: s1 [file s1]

Supporting information

**Preparation and Drug Loading Properties of Amphoteric Cassava Starch  
Nanoparticles**

Xinling Xie, Youquan Zhang\*, Yong Zhu, Yiling Lan

Guangxi Key Laboratory of Petrochemical Resource Processing and Process Intensification Technology,  
School of Chemistry and Chemical Engineering, Guangxi University, Nanning 530004, China

**S1. Effects of initial concentration of PTX ( $c_0$ ) on the equilibrium adsorption capacity and encapsulation efficiency**

| $c_0(\text{mg}\cdot\text{L}^{-1})$ | $c_e(\text{mg}\cdot\text{L}^{-1})$ | $q_e(\text{mg}\cdot\text{g}^{-1})$ | encapsulation efficiency (%) |
|------------------------------------|------------------------------------|------------------------------------|------------------------------|
| 40                                 | 18.94                              | 21.06                              | 52.65                        |
| 70                                 | 43.22                              | 26.78                              | 38.26                        |
| 100                                | 67.93                              | 32.07                              | 32.07                        |
| 130                                | 95.57                              | 34.43                              | 26.48                        |
| 160                                | 124.98                             | 35.02                              | 21.89                        |

**S2. The parameters fitting results of Langmuir and Freundlich isotherm adsorption equations**

| Model      | $q_m(\text{mg}\cdot\text{g}^{-1})$ | $K_L(\times 10^{-2}\text{L}\cdot\text{mg}^{-1})$ | $n$  | $K_f$ | $R^2$  |
|------------|------------------------------------|--------------------------------------------------|------|-------|--------|
| Langmuir   | 40.67                              | 5.23                                             | 3.51 | 9.22  | 0.9974 |
| Freundlich |                                    |                                                  |      |       | 0.9771 |

**S3. The parameter fitting results of Ritger-Peppas release kinetic equation**

| $pH$ | $K_H$ | $n$  | $R^2$  |
|------|-------|------|--------|
| 7    | 8.99  | 0.32 | 0.9952 |
| 6    | 9.29  | 0.35 | 0.9991 |
| 5    | 8.61  | 0.45 | 0.9906 |
| 4    | 9.53  | 0.47 | 0.9928 |
